# Supplementary material for: Testing Patterns for CKD-MBD Abnormalities in a Sample US Population
Source: PubMed Central journal article supplement (PMC8071625; doi:10.1016/j.ekir.2020.12.036), 2021-01-06

**Supplementary Table S1.** EHR codes used for defining the CKD cohorts

| CKD Diagnosis (SNOMED CT) |  |  |
|---------------------------|--|--|
| 433144002 (stage 3)       |  |  |
| 431857002 (stage 4)       |  |  |
| 433146000 (stage 5)       |  |  |

  

| eGFR Lab Result (LOINC) |         |         |
|-------------------------|---------|---------|
| 69405-9                 | 50044-7 | 70969-1 |
| 33914-3                 | 48642-3 | 88293-6 |
| 62238-1                 | 77147-7 | 88294-4 |
| 48643-1                 | 50210-4 | 76633-7 |

  

| Creatinine Lab Result* (LOINC) |         |         |
|--------------------------------|---------|---------|
| 77140-2                        | 2160-0  | 35203-9 |
| 59826-8                        | 14682-9 | 45066-8 |
| 38483-4                        | 72271-0 |         |

  

| ESRD or Kidney Transplant (SNOMED CT) |           |           |
|---------------------------------------|-----------|-----------|
| 251869004                             | 428982002 | 238321006 |
| 105502003                             | 698810000 | 398887003 |
| 236435004                             | 46177005  | 70536003  |
| 443596009                             | 67970008  | 23137002  |
| 33461007                              | 238318009 | 175902000 |
| 442326005                             | 238319001 |           |
| 70536003                              | 71192002  |           |

\*When a creatinine value was available in the EHR, but there was no corresponding eGFR value, we calculated eGFR using the MDRD equation (Levey Ann Intern Med 2006;145(4):247-254).

CKD, chronic kidney disease; eGFR, estimated glomerular filtration rate; EHR, electronic health record; LOINC: Logical Information Identifiers Names and Codes, SNOMED CT: Systematized Nomenclature of Medicine Clinical Terms.

**Supplementary Table S2.** EHR codes used to identify testing and lab results related to monitoring for CKD-MBD abnormalities

| Testing (SNOMED CT and CPT)                                                                                               |                                                                                                              |                                                                             |
|---------------------------------------------------------------------------------------------------------------------------|--------------------------------------------------------------------------------------------------------------|-----------------------------------------------------------------------------|
| PTH SNOMED CT:<br>3352000<br>169181004<br>271541003<br>391554001                                                          |                                                                                                              | PTH CPT:<br>83970<br>3278F                                                  |
| Phosphorus SNOMED CT:<br>8364005<br>104866001<br>121797002<br>312473009                                                   | Phosphorus SNOMED CT:<br>271241002<br>401145005<br>104868000<br>44277000                                     | Phosphorus CPT<br>84100<br>80069<br>3278F                                   |
| 25D SNOMED CT: 83729008<br>104656006<br>169203007<br>270990000<br>447680002<br>412925008                                  | 25D SNOMED CT:<br>12199005<br>447678008<br>313756002<br>313757006<br>105029001<br>447679000                  | 25D CPT:<br>82306<br>82307                                                  |
| Calcium SNOMED CT:<br>71878006<br>312472004<br>711359007<br>390963002<br>390966005<br>271240001<br>166708003<br>391084000 | Calcium SNOMED CT:<br>391551009<br>443796007<br>442156005<br>252148000<br>167209002<br>44277000<br>165102003 | Calcium CPT:<br>82310<br>82330<br>80047<br>80048<br>80053<br>80069<br>3278F |
| ALP SNOMED CT:<br>88810008<br>8244002<br>271052004<br>313846006<br>313845005                                              | ALP SNOMED CT:<br>390962007<br>271234008<br>167209002<br>26958001                                            | ALP CPT:<br>84075<br>84080<br>80053<br>80076                                |
| Lab result (LOINC)                                                                                                        |                                                                                                              |                                                                             |
| PTH: 2731-8, 14866-8<br>(excluding values > 6000<br>pg/mL)                                                                | 25D: 1989-3, 62292-8,<br>14635-7 (excluding<br>values >200 ng/mL)                                            | ALP: 6768-6, 1783-0 (excluding<br>values < 20 or > 500 U/L)                 |
| Phosphorus: 2777-1, 2774-8,<br>14879-1, 24519-1 (excluding<br>values < 1.5 or > 16 mg/dL)                                 | Calcium: 17861-6, 49765-1,<br>2000-8, 1996-8 (excluding<br>values <6 or >18 mg/dL)                           |                                                                             |

---

---

ALP, alkaline phosphatase; CKD-MBD, chronic kidney disease mineral and bone disorder; CPT, Current Procedural Terminology; LOINC: Logical Information Identifiers Names and Codes; PTH, parathyroid hormone; SNOMED CT: Systematized Nomenclature of Medicine Clinical Terms.

**Supplementary Table S3.** RxNorm codes used to identify medications prescribed for CKD-MBD abnormalities

| Activated vitamin D compounds |                  |                   |                  |
|-------------------------------|------------------|-------------------|------------------|
| Calcitriol:                   |                  |                   |                  |
| 1894                          | 261283           |                   |                  |
| 152323                        | 308867           |                   |                  |
| 209006                        | 308868           |                   |                  |
| 209007                        | 313932           |                   |                  |
| Paricalcitol:                 |                  |                   |                  |
| 73710                         | 577324           |                   |                  |
| 221005                        | 606854           |                   |                  |
| 577315                        | 606859           |                   |                  |
| 577317                        | 606861           |                   |                  |
| Doxercalciferol:              |                  |                   |                  |
| 11516                         | 406503           |                   |                  |
| 261247                        | 540687           |                   |                  |
| 261539                        | 858262           |                   |                  |
| 310023                        | 858264           |                   |                  |
| Calcifediol:                  |                  |                   |                  |
| 1889                          |                  |                   |                  |
| 1855066                       |                  |                   |                  |
| 1855072                       |                  |                   |                  |
| Nutritional vitamin D         |                  |                   |                  |
| Ergocalciferol: 4018,         |                  |                   |                  |
| 92515, 107263                 | 259870, 310142   | 1007511, 1007512  | 1367409, 1367410 |
| 197645, 199832                | 485550, 654203   | 1007516, 1008264  | 1367416, 1367421 |
| 212374, 237402                | 795480, 877408   | 1014182, 1086605  | 1941742, 2044659 |
| 237723, 245493                | 991456, 1001409  | 1088798, 1100896  |                  |
| 245494                        | 1001758, 1007285 | 1112493, 1233664  |                  |
| Cholecalciferol:              |                  |                   |                  |
| 2418, 92066                   | 833746, 835531   | 1091242, 1091245  | 1292776, 1297389 |
| 150923, 199362                | 845523, 846138   | 1091283, 1092183  | 1298198, 1298199 |
| 204634, 209638                | 846146, 847121   | 1092380, 1094022  | 1299811, 1302680 |
| 210133, 215818                | 849410, 849530   | 1095603, 1095605, | 1303911, 1303916 |
| 215819, 216438                | 857466, 861054   | 1095608, 1098884  | 1304498, 1304503 |
| 240029, 245500                | 864665, 864669   | 1098887, 1099861  | 1305135, 1310948 |
| 248506, 251154                | 865078, 865087   | 1099869, 1100262  | 1310954, 1312502 |
| 309263, 360422                | 866406, 877318   | 1100466, 1100469  | 1313925, 1313928 |
| 428485, 435020                | 880340, 881314   | 1100894, 1111681  | 1313933, 1362805 |
| 485689, 577055                | 884773, 885489   | 1114604, 1114846  | 1365980, 1366144 |
| 577068, 607553                | 891692, 898694   | 1114847, 1115497  | 1366149, 1370012 |
| 608343, 608349                | 904462, 904465   | 1115877, 1116508  | 1370013, 1372696 |
| 616551, 644254                | 904492, 904495   | 116511, 1116514   | 1375985, 1424840 |

|                |                  |                  |                  |
|----------------|------------------|------------------|------------------|
| 644256, 668292 | 967916, 967919   | 1119570, 1119573 | 1424841, 1425205 |
| 685054, 701441 | 991376, 994794   | 1125499, 1125500 | 1429287, 1432986 |
| 705726, 705728 | 994831, 1001659  | 1148597, 1148599 | 1435912, 1435917 |
| 707647, 724165 | 1001679, 1001691 | 1150266, 1189592 | 1437783, 1442442 |
| 724411, 762908 | 1001751, 1005702 | 1189599, 1193036 | 1442443, 1485531 |
| 801663, 802795 | 1006914, 1007068 | 1193037, 1193041 | 1486349, 1488353 |
| 804146, 804614 | 1007121, 1007378 | 1193046, 1233031 | 1493427, 1536164 |
| 804617, 808596 | 1007560, 1007763 | 1233032, 1233607 | 1543212, 1593743 |
| 809533, 809536 | 1007835, 1008035 | 1234482, 1243353 | 1593744, 1601102 |
| 809540, 809555 | 1008292, 1008522 | 1243364, 1243393 | 1650274, 1651279 |
| 809556, 809559 | 1008555, 1008761 | 1243399, 1243405 | 1651282, 1720258 |
| 809572, 828296 | 1008768, 1008792 | 1243415, 1244008 | 1741416, 1746494 |
| 829749, 829758 | 1008800, 1041795 | 1244014, 1244021 | 1789542, 1790877 |
| 829759, 829993 | 1042692, 1043300 | 1244924, 1244925 | 1809754, 1870970 |
| 829998, 832907 | 1043301, 1087280 | 1244926, 1244930 | 1874857, 1919489 |
| 832908, 832909 | 1087282, 1087285 | 1244936, 1246098 | 1996206          |
| 832910, 832919 | 1088134, 1088432 | 1291265, 1291276 |                  |
| 832924, 833456 | 1088534, 1088800 | 1291595, 1292029 |                  |
| 833741         |                  |                  |                  |

---

Oral phosphate binders

|                   |                |                |  |
|-------------------|----------------|----------------|--|
| Sevelamer: 135118 | 749207, 749210 | 857224, 857226 |  |
| 214824, 237125    | 857208, 857210 | 861370, 861373 |  |
| 660890, 749206    | 857216, 857218 | 861375, 861377 |  |

Calcium acetate:

|                |                |                  |  |
|----------------|----------------|------------------|--|
| 197433, 200147 | 215849, 219236 | 645216, 830639   |  |
| 209010, 209011 | 245133, 282539 | 830642, 1099804  |  |
| 214342, 214344 | 359296, 428703 | 1099805, 1099808 |  |

Calcium carbonate:

|                |                  |                 |                  |
|----------------|------------------|-----------------|------------------|
| 1897, 91254,   | 809559, 809572   | 359297, 360422  | 1092183, 1094022 |
| 92066, 150923, | 817958, 821119   | 384518, 403826  | 1099861, 1099869 |
| 171000, 198527 | 824590, 826091   | 403828, 404179  | 1099878, 1100466 |
| 198529, 198530 | 828296, 829758   | 428485, 428633  | 1100894, 1100896 |
| 198531, 198533 | 829759, 832907   | 428634, 476549  | 1102202, 1102207 |
| 198534, 198535 | 832908, 832909   | 577040, 577049  | 1111681, 1112493 |
| 198542, 198864 | 832910, 832919   | 577181, 606683  | 1112810, 1114604 |
| 198865, 199296 | 832924, 833456   | 607278, 608343  | 1125499, 1125500 |
| 200091, 200154 | 833741, 833746   | 642335, 642338  | 1189592, 1189599 |
| 200189, 200350 | 845523, 861054   | 642355, 642356  | 1233607, 1243353 |
| 204634, 204636 | 864665, 864669   | 644254, 645048  | 1243364, 1243393 |
| 205075, 205233 | 865078, 865087   | 647558, 654203  | 1243399, 1243405 |
| 210097, 210116 | 866486, 867494   | 655935, 668292  | 1243415, 1244021 |
| 210117, 210133 | 867497, 884773   | 688892, 691005  | 1244924, 1244925 |
| 210135, 210143 | 905095, 991370   | 691006, 691010  | 1244926, 1244930 |
| 210248, 210249 | 991376, 994240   | 691012, 701441  | 1244936, 1245383 |
| 212460, 212462 | 994243, 994794   | 706946, 707270  | 1245384, 1245389 |
| 212495, 212825 | 994831, 998704   | 707558, 729490  | 1245406, 1248142 |
| 214346, 214347 | 1001409, 1001659 | 790271, 794747  | 1251312, 1297389 |
| 214349, 215817 | 1001679, 1001691 | 795182, 795186, | 1298165, 1299811 |

---

|                  |                  |                  |                  |
|------------------|------------------|------------------|------------------|
| 215818, 215822   | 1006914, 1007068 | 97654, 808596,   | 1302636, 1302637 |
| 215829 215830,   | 1007166, 1007378 | 09533, 809536    | 1310948, 1310954 |
| 215835 215850,   | 1007404, 1007498 | 1007775, 1007778 | 1311062, 1313925 |
| 218833 218957,   | 1007511, 1007763 | 1008004, 1008237 | 1362805, 1367409 |
| 218959 218991,   | 283641, 284051   | 1008264, 1008515 | 1367421, 1372696 |
| 218995 219327,   | 307685, 308844   | 1008522, 1008555 | 1426128, 1432465 |
| 220327 220508,   | 308888, 308889   | 1008556, 1008623 | 1432529, 1437783 |
| 220509           | 308891, 308892   | 1008749, 1008800 | 1438105, 1441385 |
| 220510, 220511   | 308895, 308896   | 1009020, 1009033 | 1442442, 1442443 |
| 237402, 237420   | 308900, 308903   | 1041833, 1044524 | 1484731, 1491617 |
| 237865, 237867   | 308905, 308906   | 1044532, 1086605 | 1491618, 1492387 |
| 242623, 250222   | 308907, 308914   | 1087258, 1087259 | 1493427, 1536164 |
| 259285, 259567   | 308915, 313884   | 1087262, 1087280 | 1538595, 1540539 |
| 259590, 261616   | 315015, 317865   | 1087282, 1087285 | 1543212, 1607303 |
| 261688, 282465   | 318076, 346210   | 1088798, 1088800 | 1653049, 1722689 |
| 282746, 283174   | 346211, 351590   | 1088805, 1091242 | 1722690, 1722695 |
| 809540, 809547   | 352490, 352491   | 1091245, 1091283 | 1789542          |
| 809555, 809556   |                  |                  |                  |
| Lanthanum        | 602635, 603112   |                  |                  |
| carbonate:       | 603122, 642452   |                  |                  |
| 234416, 356761   | 1551881, 1551884 |                  |                  |
| 477347, 542465   | 1551886          |                  |                  |
| Sucroferric      |                  |                  |                  |
| oxyhydroxide:    |                  |                  |                  |
| 1484283, 1484289 |                  |                  |                  |
| 1484290, 1484296 |                  |                  |                  |
| Ferric citrate:  |                  |                  |                  |
| 1594675, 1594680 |                  |                  |                  |
| 1596018, 1596023 |                  |                  |                  |

CKD-MBD, chronic kidney disease mineral bone disorder,

**Supplementary Table S4.** ICD-9/10-CM codes used to identify comorbid conditions.

| Atherosclerotic heart disease         |        |        |                |
|---------------------------------------|--------|--------|----------------|
| 410                                   | 414    | I21    | I25            |
| 411                                   | V45.81 | I22    | Z95.1          |
| 412                                   | V45.82 | I23    | Z95.5          |
| 413                                   | I20    | I24    | Z98.61         |
| Congestive heart failure              |        |        |                |
| 398.91                                | 404.91 | I09.9  | I42.7          |
| 402.01                                | 404.93 | I11.0  | I42.8          |
| 402.11                                | 425.4  | I13.0  | I42.9          |
| 402.91                                | 425.5  | I13.2  | I43            |
| 404.01                                | 425.7  | I25.5  | I50            |
| 404.03                                | 425.8  | I42.0  | P29.0          |
| 404.11                                | 425.9  | I42.5  |                |
| 404.13                                | 428    | I42.6  |                |
| Cardiac arrhythmia                    |        |        |                |
| 426.0                                 | 427.2  | 996.04 | I47            |
| 426.13                                | 427.3  | V45.0  | I48            |
| 426.7                                 | 427.4  | V53.3  | I49            |
| 426.9                                 | 427.6  | I44.1  | R00.0          |
| 426.10                                | 427.8  | I44.2  | R00.1          |
| 426.12                                | 427.9  | I44.3  | R00.8          |
| 427.0                                 | 785.0  | I45.6  | T82.1          |
| 427.1,                                | 996.01 | I45.9  | Z45.0<br>Z95.0 |
| Cerebrovascular disease               |        |        |                |
| 362.34                                | 435    | I60    | I66            |
| 430                                   | 436    | I61    | I67            |
| 431                                   | 437    | I62    | I68            |
| 432                                   | 438    | I63    | I69            |
| 433                                   | G45    | I64    | H34.0          |
| 434                                   | G46    | I65    |                |
| Peripheral vascular disease           |        |        |                |
| 093.0                                 | 443.8  | I70    | I77.1          |
| 440                                   | 443.9  | I71    | I79.0          |
| 441                                   | 447.1  | I73.1  | I79.2          |
| 443.1                                 | 557    | I73.8  | K55            |
| 443.2                                 | V43.4  | I73.9  | Z95.82         |
| Chronic obstructive pulmonary disease |        |        |                |
| 416.8                                 | 502    | J42    | J65            |
| 416.9                                 | 503    | J43    | J66            |
| 490                                   | 504    | J44    | J67            |
| 491                                   | 505    | J45    | J68.4          |

|     |       |     |       |
|-----|-------|-----|-------|
| 492 | 506.4 | J46 | J70.1 |
| 493 | 508.1 | J47 | J70.3 |
| 494 | 508.8 | J60 |       |
| 495 | I27.8 | J61 |       |
| 496 | I27.9 | J62 |       |
| 500 | J40   | J63 |       |
| 501 | J41   | J64 |       |

---

Gastrointestinal bleeding

---

|                |                |                |                 |
|----------------|----------------|----------------|-----------------|
| 456.0, 456.20, | 533.01, 533.10 | 535.51, 535.61 | K27.6, K28.0    |
| 530.21, 531.00 | 533.11, 533.20 | 535.71, 537.83 | K28.1, K28.2    |
| 531.01, 531.10 | 533.21, 533.40 | 537.84, 569.85 | K28.4, K28.5    |
| 531.11, 531.20 | 533.41, 533.50 | 578.0, 578.9   | K28.6, K29.01   |
| 531.21, 531.40 | 533.51, 533.60 | I85.01, I85.11 | K29.21, K29.31  |
| 531.41, 531.50 | 533.61, 534.00 | K22.11, K25.0  | K29.41, K29.51  |
| 531.51, 531.60 | 534.01, 534.10 | K25.1, K25.2   | K29.61, K29.71  |
| 531.61, 532.00 | 534.11, 534.20 | K25.4, K25.5   | K29.81, K29.91  |
| 532.01, 532.10 | 534.21, 534.40 | K25.6, K26.0   | K31.811, K31.82 |
| 532.11, 532.20 | 534.41, 534.50 | K26.1, K26.2   | K55.21, K92.0   |
| 532.21, 532.40 | 534.51, 534.60 | K26.4, K26.5   | K92.2           |
| 532.41, 532.50 | 534.61, 535.01 | K26.6, K27.0   |                 |
| 532.51, 532.60 | 535.11, 535.21 | K27.1, K27.2   |                 |
| 532.61, 533.00 | 535.31, 535.41 | K27.4, K27.5   |                 |

---

Liver disease

---

|                |                 |                    |               |
|----------------|-----------------|--------------------|---------------|
| 070.22, 070.23 | 570, 571, 572.2 | B19.20, B19.21,    | K76.0, K76.2, |
| 070.32, 070.33 | 572.3, 572.4    | B19.9, I85, I86.4, | K76.3, K76.4, |
| 070.44, 070.54 | 572.8, 573.3    | I98.2, K70, K71.1, | K76.5, K76.6, |
| 070.6, 070.7   | 573.4, 573.8    | K71.3, K71.4,      | K76.7, K76.8, |
| 070.9, 456.0   | 573.9, V42.7    | K71.5, K71.7,      | K76.9, Z94.4  |
| 456.1, 456.2   | B18, B19.0      | K72, K73, K74,     |               |

---

Cancer

---

|               |               |                 |               |
|---------------|---------------|-----------------|---------------|
| 196, 197, 198 | C62, C63, C64 | C74, C75, C76   | C08, C09, C10 |
| 199, 140, 141 | 160, 161, 162 | C97, 188, 189   | C11, C12, C13 |
| 142, 143, 144 | 163, 164, 165 | 190, 191, 192   | C14, C15, C16 |
| 145, 146, 147 | 166, 167, 168 | 193, 194, 195   | C17, C18, C19 |
| 148, 149, 150 | 169, 170, 171 | 200, 201, 202   | C20, C21, C22 |
| 151, 152, 153 | 172, 174, 175 | 203.0, 238.6    | C23, C24, C25 |
| 154, 155, 156 | 176, 177, 178 | C81, C82, C83   | C26, C30, C31 |
| 157, 158, 159 | 179, 180, 181 | C84, C85, C88   | C32, C33, C34 |
| C46, C47, C48 | 182, 183, 184 | C96, C90.0      | C37, C38, C39 |
| C49, C50, C51 | 185, 186, 187 | C90.2, C77, C78 | C40, C41, C43 |
| C52, C53, C54 | C65, C66, C67 | C79, C80, C00   | C45           |
| C55, C56, C57 | C68, C69, C70 | C01, C02, C03   |               |
| C58, C60, C61 | C71, C72, C73 | C04, C05, C06   |               |
|               |               | C07             |               |

---

Diabetes

---

|     |     |
|-----|-----|
| 250 | E11 |
|-----|-----|

---



|                     |     |     |
|---------------------|-----|-----|
| E10                 | E13 |     |
| <b>Hypertension</b> |     |     |
| 401                 | 405 | I13 |
| 402                 | I10 | I15 |
| 403                 | I11 | I16 |
| 404                 | I12 |     |
| <b>Dementia</b>     |     |     |
| 290                 | F02 |     |
| F00                 | F03 |     |
| F01                 | G30 |     |
| <b>HIV</b>          |     |     |
| 042                 | V08 | B22 |
| 043                 | B20 | B24 |
| 044                 | B21 | Z21 |

ICD-9/10-CM, International Classification of Diseases, Ninth/Tenth Revision, Clinical Modification.

**Supplementary Table S5.** Follow-up time in the CKD stage 3, 4 and 5 cohorts

|                       | CKD stage 3        | CKD stage 4       | CKD stage 5       |
|-----------------------|--------------------|-------------------|-------------------|
|                       | <i>n</i> = 215,553 | <i>n</i> = 43,576 | <i>n</i> = 11,407 |
| Follow up time, days  |                    |                   |                   |
| Mean (SD)             | 838.84 (634.36)    | 603.82 (546.74)   | 219.45 (320.95)   |
| Median (25th, 75th)   | 690 (382, 1165)    | 457 (187, 847)    | 81 (21, 309)      |
| Follow up time, years |                    |                   |                   |
| Mean (SD)             | 2.30 (1.74)        | 1.65 (1.50)       | 0.60 (0.88)       |
| Median (25th, 75th)   | 1.89 (1.05, 3.19)  | 1.25 (0.51, 2.32) | 0.22 (0.06, 0.85) |

CKD, chronic kidney disease; SD, standard deviation.

**Figure S1.** Density plots displaying the full distribution of lab results for each biochemical marker.

**PTH**

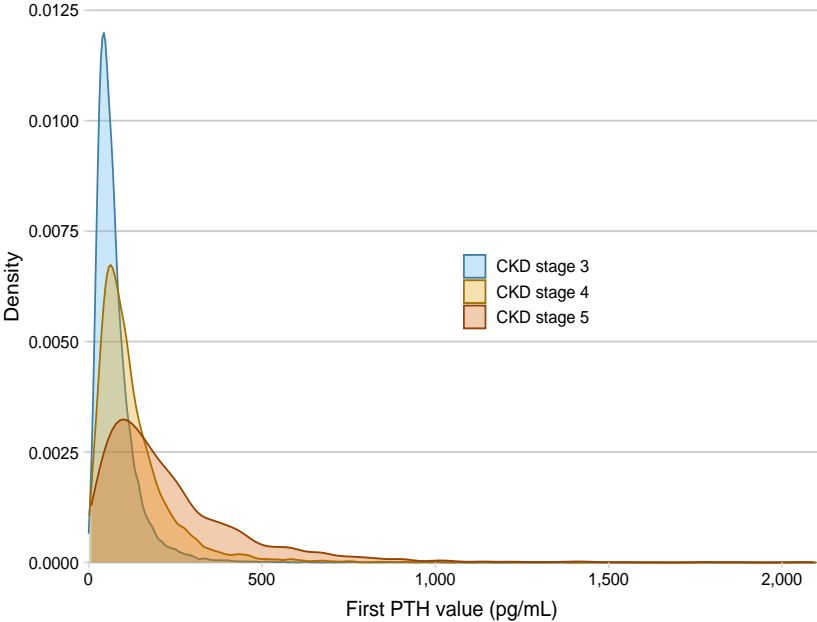

**25D**

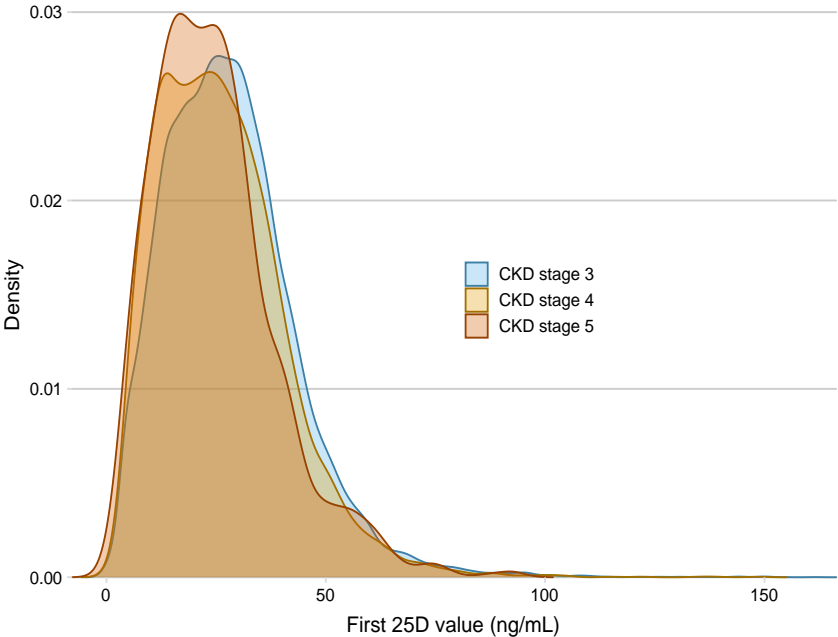

# Phosphorus

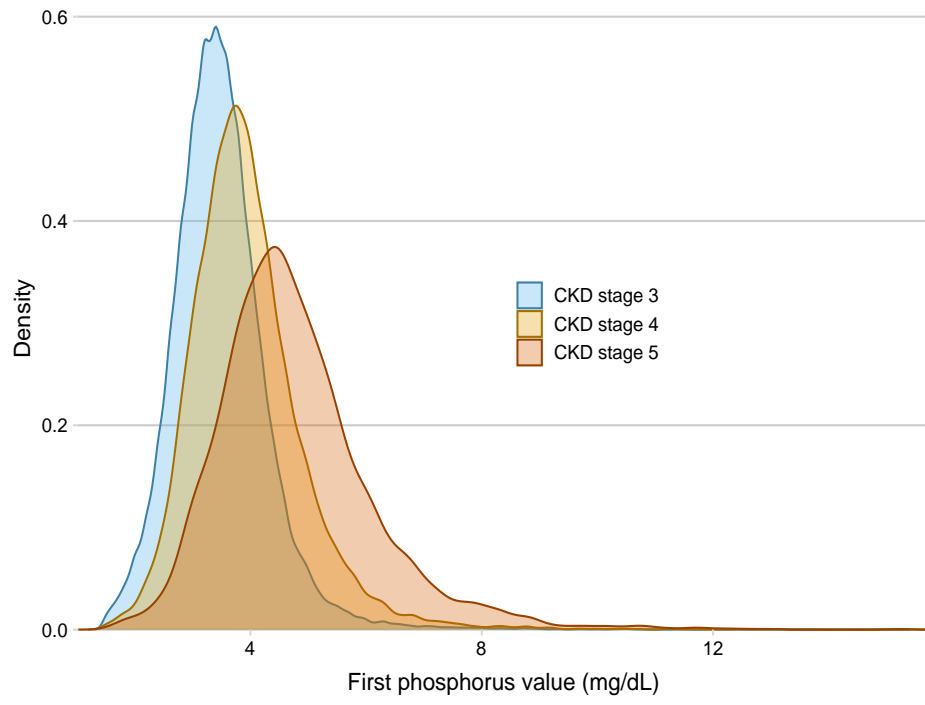

Supplement: mmc1.pdf [file mmc1.pdf]
